# Supplementary material
Source: Springer Nature journal article supplement (https://www.springermedizin.de/resource/supplementary/13020_2010_88_MOESM3_ESM.pdf/9640950)

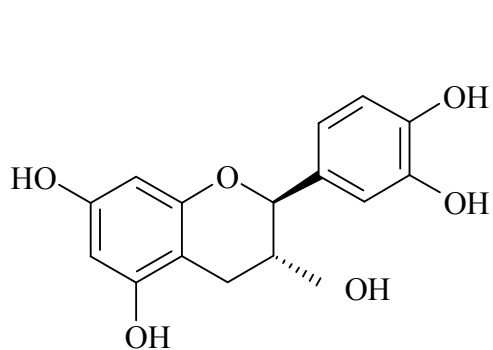

1

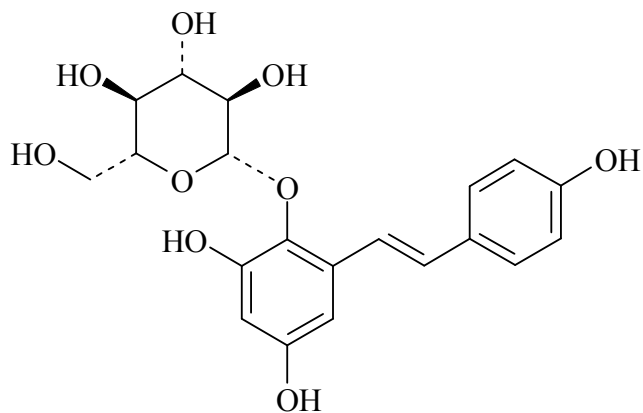

2

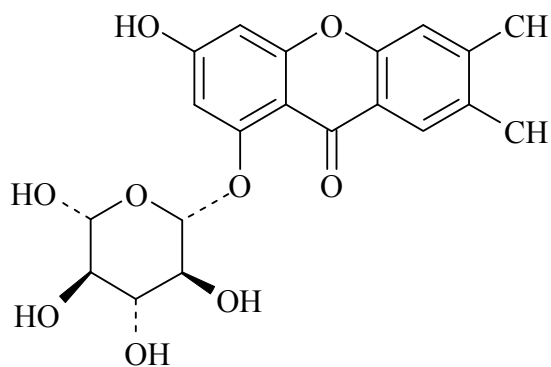

3

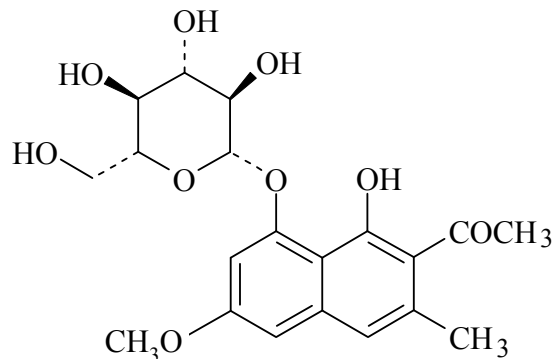

4

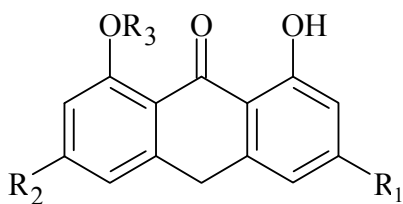

5  $R_1=CH_3$ ;  $R_2=OH$ ;  $R_3=Glc$

6  $R_1=CH_3$ ;  $R_2=OH$ ;  $R_3=(6'-malonyl)-Glc$

7  $R_1=CH_3$ ;  $R_2=OCH_3$ ;  $R_3=Glc$

8  $R_1=CH_3$ ;  $R_2=OCH_3$ ;  $R_3=(6'-malonyl)-Glc$

9  $R_1=CH_3$ ;  $R_2=OH$ ;  $R_3=H$

10  $R_1=CH_3$ ;  $R_2=OCH_3$ ;  $R_3=H$

Note:

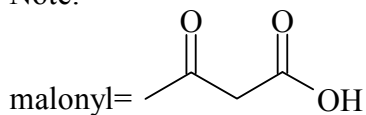

Supplement: MOESM3 [file 9640950]
